# Supplementary material for: Cyclophilin anaCyp40 regulates photosystem assembly and phycobilisome association in a cyanobacterium
Source: Springer Nature journal article supplement (doi:10.1038/s41467-022-29211-w), 2022-03-30
Supplement: MOESM1 [file 41467_2022_29211_MOESM1_ESM.pdf]

**SUPPLEMENTARY INFORMATION TO THE MANUSCRIPT: “Cyclophilin anaCyp40 regulates photosystem assembly and phycobilisome association in a cyanobacterium” of Shivam Yadav, Martin Centola, Mathilda Glaesmann, Denys Pogoryelov, Roman Ladig, Mike Heilemann, L.C. Rai, Özkan Yildiz and Enrico Schleiff**

**SUPPLEMENTARY FIGURES**

Supplementary Fig. 1: Kinetics of the activity of *anaCyp40* $\Delta$ TM-His.

Supplementary Fig.2: The generation of the AFS-I-*anacyp40* mutant and antisense RNA transcription.

Supplementary Fig. 3: A second example for the BN-PAGE shown in Fig. 4a.

Supplementary Fig. 4: The generation of the AFS-*anacyp40*-strep mutant.

Supplementary Fig. 5: The wild-type and AFS-*anacyp40*-strep response to high NaCl.

Supplementary Fig. 6: Full blot for Figure 4d.

Supplementary Fig. 7: Full blot for Figure 4e.

Supplementary Fig. 8: Estimated resolution of the super-resolution microscopy images.

Supplementary Fig. 9: Super-resolution microscopy images of the wild type control.

Supplementary Fig. 10: The interactions of monomers in the *anaCyp40* crystal.

Supplementary Fig. 11: Crystal contacts between the C-terminus of one *anaCyp40* molecule with C-domain of a second molecule

Supplementary Fig. 12: Comparison of *anaCyp40* Q-domain to structurally related proteins.

Supplementary Fig. 13: The electrostatic surface potential distribution of *anaCyp40*

**SUPPLEMENTARY TABLES**

Supplementary Table 1: List of genes used for phylogenetic analysis.

Supplementary Table 2: Overview on transmembrane domain prediction.

Supplementary Table 3: Kinetic parameters of cyclophilins from different species.

Supplementary Table 4: List of *Anabaena* strains used in this study

Supplementary Table 5: PBS composition.

Supplementary Table 6: Photosynthetic parameter of wild-type and AFS-I-*anacyp40*.

Supplementary Table 7: Data collection and refinement statistics

Supplementary Table 8: Oligonucleotides used in this study.

Supplementary Table 9: Plasmids used in this study.

**REFERENCES IN SUPPLEMENTARY MATERIALS ONLY**

**SUPPLEMENTARY DATA**

Supplementary Data to Figure 1, 2, 3, 5 and Supplementary Figure 1

## SUPPLEMENTAL FIGURES

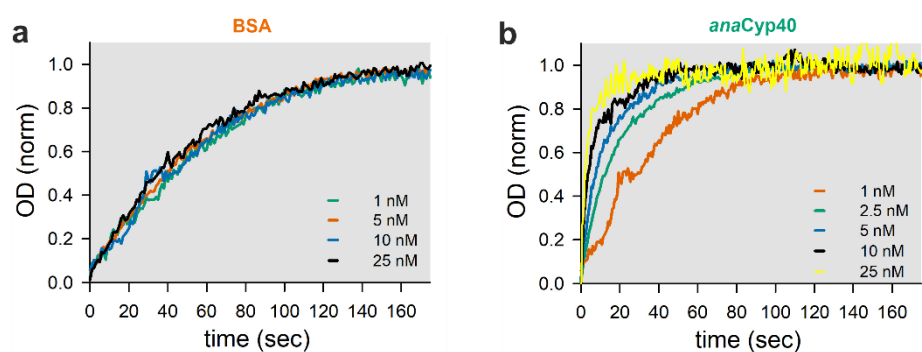

**Supplementary Fig. 1:** Kinetics of the activity of *anaCyp40*<sub>ΔTM</sub>-His.

Purified BSA (a) or *anaCyp40*<sub>ΔTM</sub>-His (b) at indicated concentrations were incubated with 40 μM N-succinyl-ala-ala-pro-phe-p-nitroanilidine and the catalytic reaction monitored by the increase of absorption at 390 nm. The values were normalized to the baseline and to the maximum. A representative experiment is shown.

## SUPPLEMENTAL FIGURES

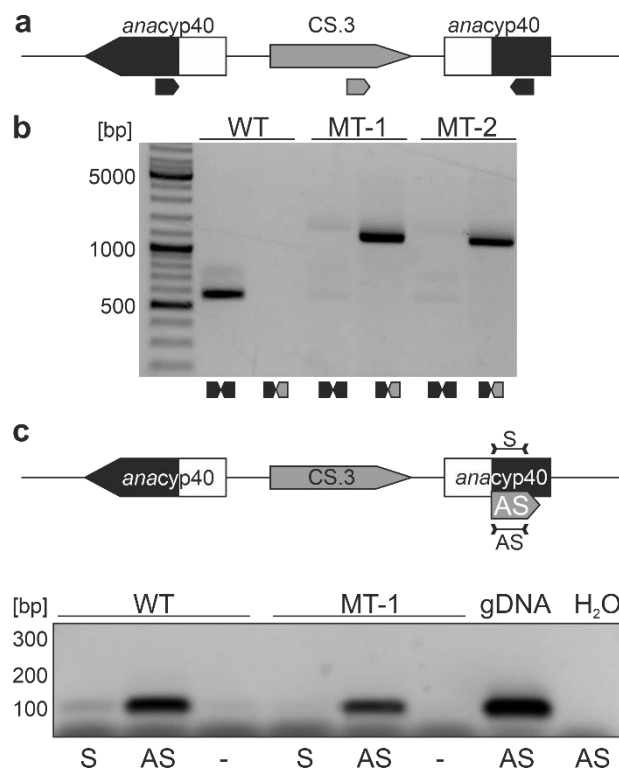

**Supplementary Fig. 2:** The AFS-I-*anacyp40* mutant and antisense RNA transcription.

**a** The model for the generated mutant indicating the position of the insertion of the plasmid and the place of annealing of used oligonucleotides is shown. **b** The segregation of the mutant was analyzed with gene and plasmid specific oligonucleotides (Supplementary Table 7) on genomic DNA isolated from wild-type and from AFS-I-*anacyp40*. The experiment was periodically repeated to confirm the segregation throughout the study. **c**. On top, a model of the genomic organization of the mutant strain indicating the position of the antisense region. The produced PCR products are indicated. For the analysis of the RNA presence, the RNA extraction was performed as described using TRIzol (Thermo Fisher Scientific)<sup>1,2</sup>. RNA was isolated from wild type (WT) and AFS-I-*anacyp40* (MT-1) after 24 h of growth in BG11<sub>0</sub> (BG11 without nitrate) where the antisense RNA transcript was induced<sup>3</sup>. The absence of DNA in the RNA samples was tested by PCR (not shown). For specific first strand cDNA synthesis 200 ng of RNA were used as template. Revert Aid Transcriptase was utilized (Thermo Fisher Scientific) according to manufacturer's protocol, specific oligonucleotides for the sense (S) and the antisense (AS) transcript were used (0.2 μM) for priming DNA synthesis. To control the RNA self-priming, a control was included where oligonucleotides were omitted (-)<sup>4</sup>. The efficiency of the oligonucleotides used for probing the antisense RNA was tested on gDNA, and the absence of self-annealing by PCR in the absence of RNA or DNA (H<sub>2</sub>O). The analysis was performed on three independent cultures. In (b) and (c) the base-pair number for the migration of the molecular main marker is indicated.

## SUPPLEMENTAL FIGURES

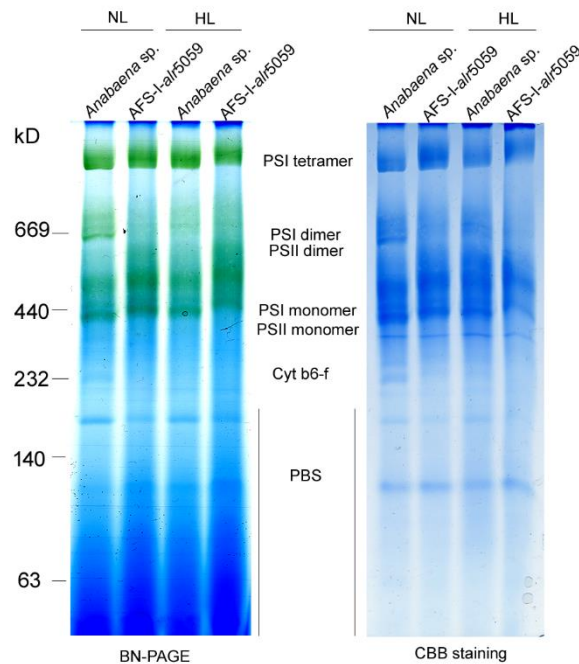

**Supplementary Fig. 3:** A second example for the BN-PAGE shown in Fig. 4a.

**a** Membranes of wild-type (green) and AFS-I-anaCyp40 (orange) grown in BG11 liquid medium at 40 or 120  $\mu\text{E}$  illumination were solubilized and subjected to BN-PAGE. The chlorophyll staining (left) and the Coomassie Blue staining (right) are shown. The Coomassie Blue staining was quantified by ImageJ and the intensity of the individual complexes was normalized to the intensity in wild-type grown at 40  $\mu\text{E}$  light intensity. A representative example of three independent trials is shown. The migration of the molecular weight standards is indicated on the left and the molecular weight is given in kDa.

## SUPPLEMENTAL FIGURES

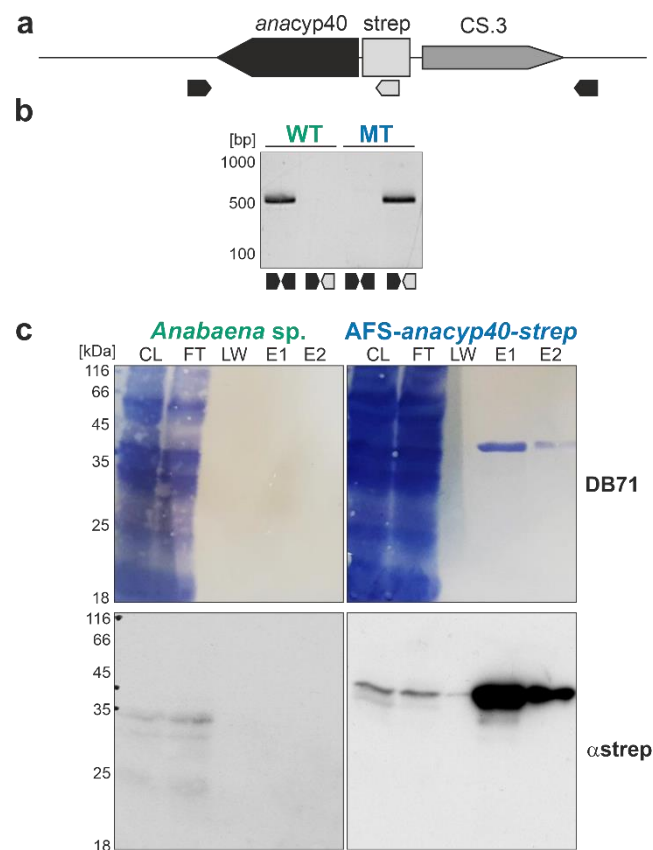

**Supplementary Fig. 4:** The generation of the AFS-*anacyp40-strep* mutant.

**a** The model for the generated mutant indicating the position of the insertion of the plasmid and the place of annealing of used oligonucleotides is shown. **b** The segregation of the AFS-*anacyp40-strep* mutant was analyzed with gene and plasmid specific oligonucleotides (Supplementary Table 7) as indicated in (a) on genomic DNA isolated from wild-type (WT) and from AFS-*anacyp40-strep* (MT). The base-pair number for the migration of the molecular main marker is indicated on the left. **c** The specific precipitation of *anaCyp40-strep* was tested after solubilisation of wild-type cells and cells from AFS-*anacyp40-strep*. The cell lysate (CL), flow through (FL), last wash fraction (LW) and Elution 1 and 2 (E1 / E2) was subjected to SDS-PAGE followed by Western Blotting. Shown is the DB71 stain (top) and the detection with anti-strep antibodies. In the cell lysate and flow through a protein band cross-reactive with the used antibodies is detectable in wild type strain, which is no longer detectable in in the last wash fraction or elution. In turn, the protein *anaCyp40-strep* is detectable in the lysate, the flow through and the elution fraction of AFS-*anacyp40-strep* cell lysate. The protein is specifically enriched as found by DB71 staining. The migration of the molecular weight standards is indicated on the left and the molecular weight is given in kDa.

## SUPPLEMENTAL FIGURES

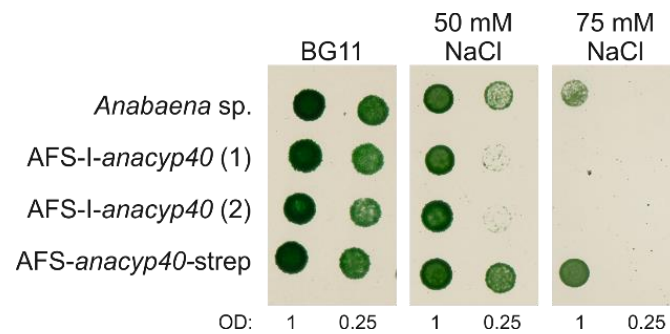

**Supplementary Fig. 5:** The wild-type and AFS-*anacyp40*-strep response to high NaCl.

The *Anabaena* sp. wild type, two independently generated AFS-I-*anaCyp40* strains (marked with (1) and (2)) as well as the AFS-I-*anacyp40*-strep mutant were spotted onto BG11 control plates and NaCl-containing BG11 plates (50 mM and 75 mM NaCl as indicated). The suspensions had an initial optical density (750 nm) of 1 or 0.25 (indicated at the bottom). The images were taken after 7 days of growth.

**SUPPLEMENTAL FIGURES**

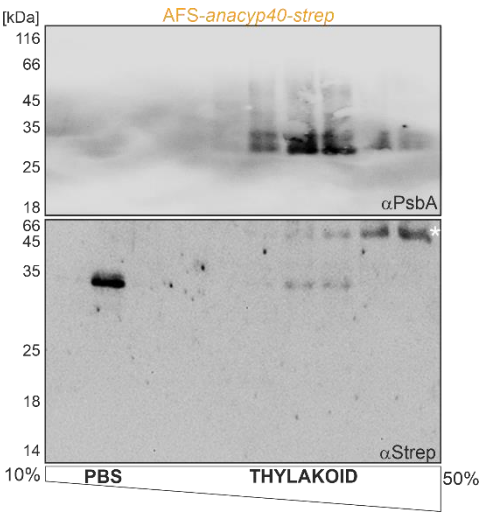

**Supplementary Fig. 6:** Full blot for Figure 4d.

The strain AFS-anaCyp40-strep was grown in BG11, cells harvested and solubilized and subjected on top of a 10-50% sucrose gradient. The fractions were subjected to SDS-PAGE followed by Western blotting and incubation with indicated antibodies. PBS and Thylakoid membrane fractions are indicated. The star indicates a cross reactivity of the antibody. The migration of the molecular weight standards is indicated on the left and the molecular weight is given in kDa.

## SUPPLEMENTAL FIGURES

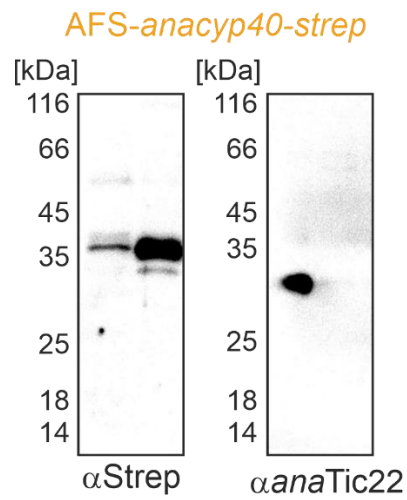

**Supplementary Fig. 7:** Full blot for Figure 4e.

Cell lysate (lane 1) and phycobilisomes (lane 2) were isolated from *AFS-anaCyp40-strep* and subjected to SDS-PAGE followed by Western blotting and incubation with indicated antibodies. The migration of the molecular weight standards is indicated on the left of each blot and the molecular weight is given in kDa.



## SUPPLEMENTAL FIGURES

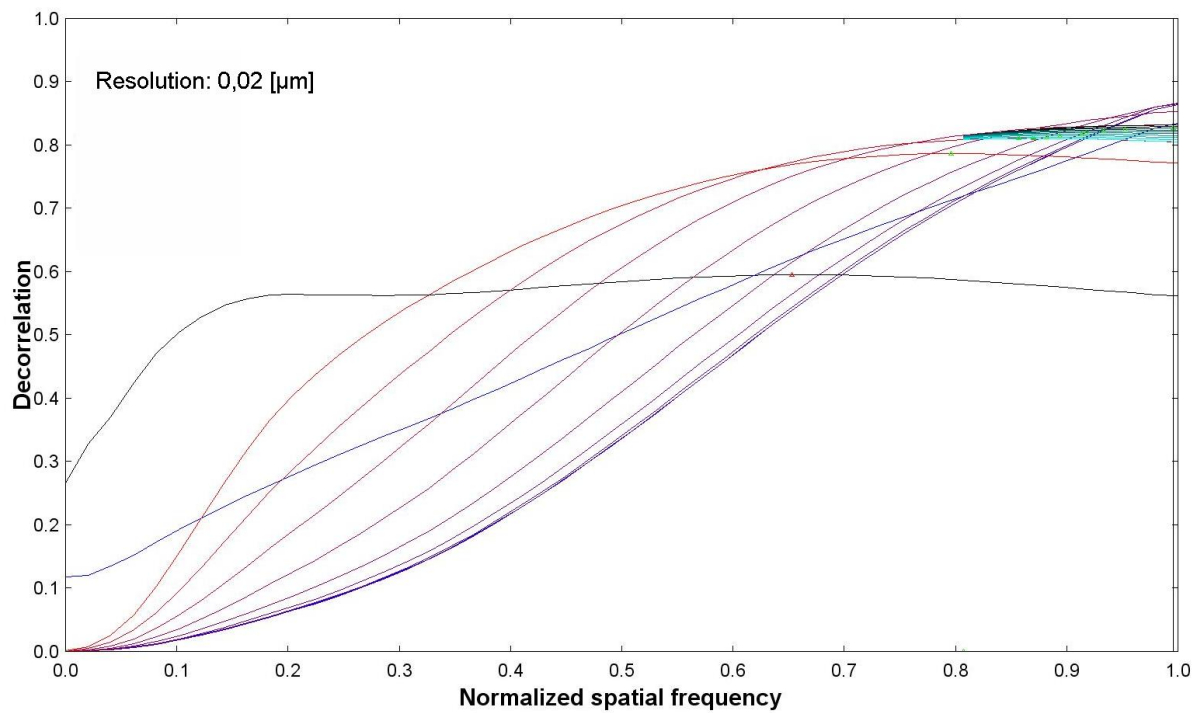

**Supplementary Fig. 8:** Estimated resolution of the super-resolution microscopy images. High-pass filtered decorrelation functions of *anaCyp40* visualized with DNA-PAINT (super-resolution microscopy). A Parameter-free image resolution estimation based on decorrelation analysis was performed.<sup>5</sup> The resolution of the *anaCyp40* channel was determined to be 20 nm, which exceeds the maximum theoretical resolution of regular confocal imaging by about a factor of 7.<sup>6</sup>

## SUPPLEMENTAL FIGURES

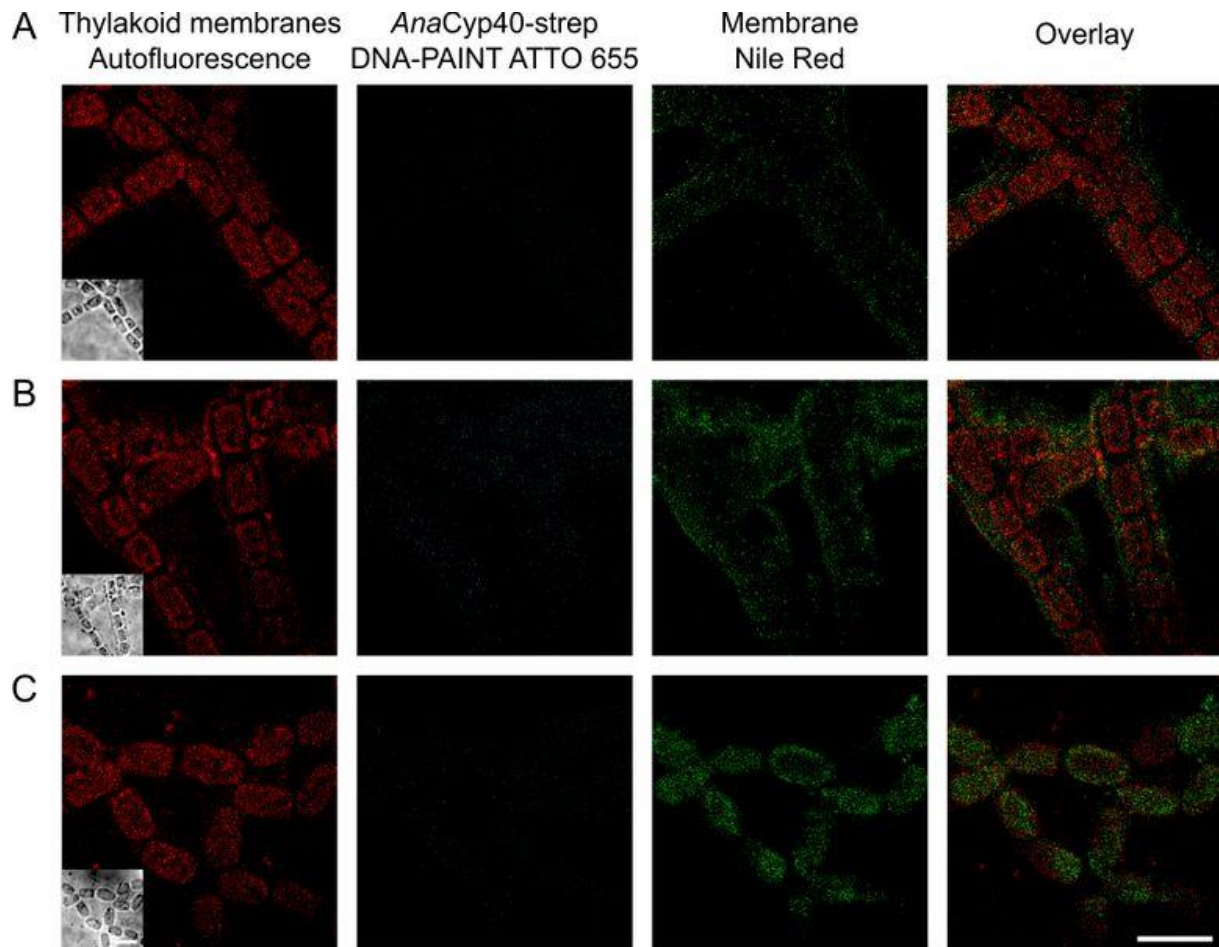

**Supplementary Fig. 9:** Super-resolution microscopy images of the wild type control.

Control measurements to evaluate specific antibody labelling were performed as described in material and methods. The endogenous fluorophores (red), *anaCyp40-strep* (cyan) and the membrane (green) were visualized in cyanobacteria only stained with the primary antibody (A), the secondary antibody (B), or in unstained cyanobacteria (C), using identical imager strad concentrations and imaging conditions to measurements shown in [Figure 5](#). In all controls the endogenous fluorophores and membrane are clearly visible, but only few localizations were detected for *anaCyp40 strep*. Representative images of multiple recordings are shown. All images are adjusted to the same scale as indicated by the bar [5  $\mu\text{m}$ ] in the right corner.

## SUPPLEMENTAL FIGURES

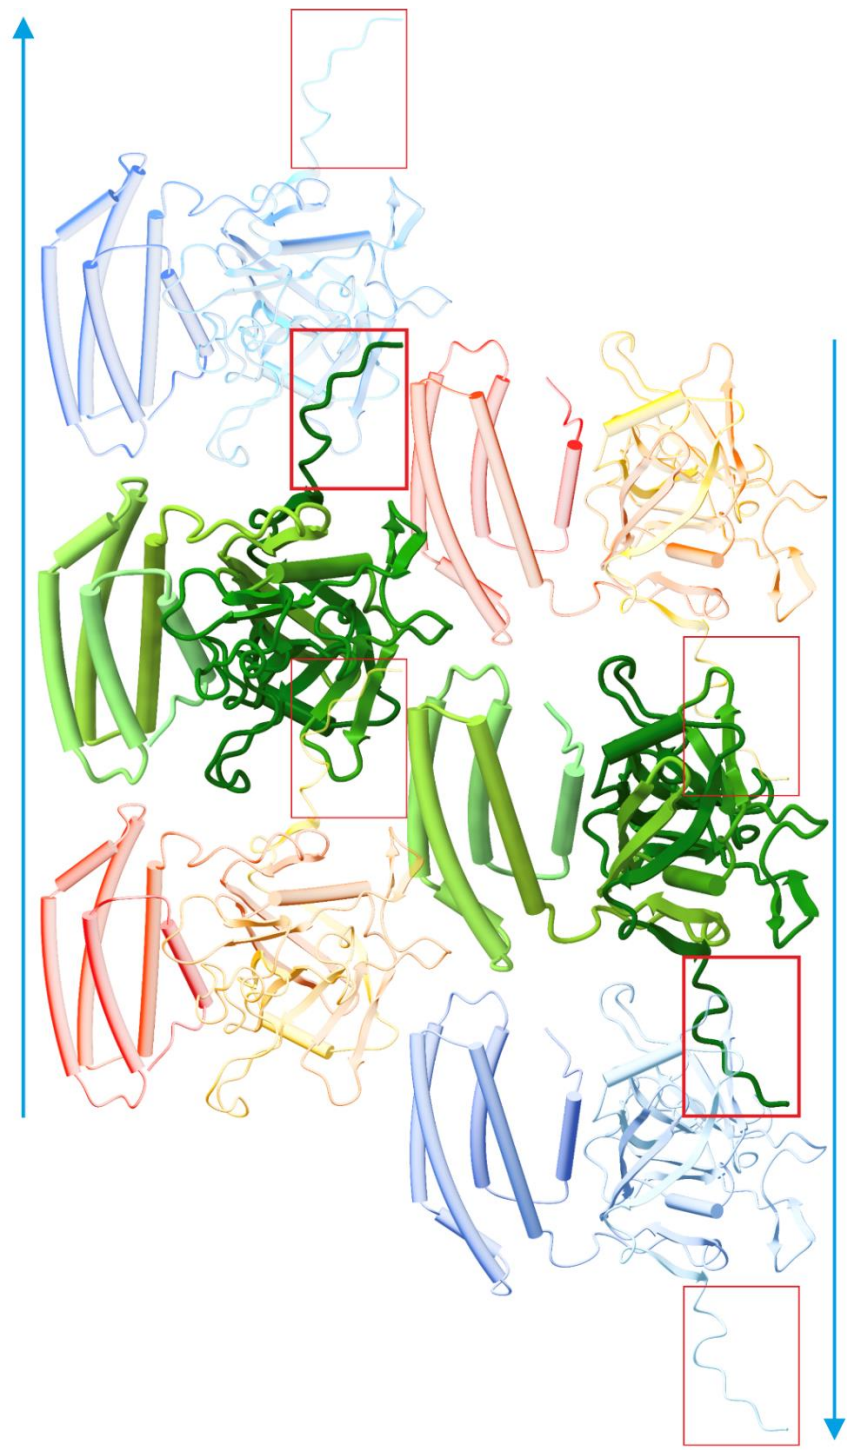

**Supplementary Fig. 10:** The interactions of monomers in the *anaCyp40* crystal.

A cutout of the molecular organization of *anaCyp40* monomers in the crystal. The monomers form layers in which the monomers form antiparallel rows, indicated by the two blue oppositely oriented arrows. The residual amino acids of the C-terminal cleavage site (red box) are involved in the crystal contacts between *anaCyp40* molecules and interacts with residues on the  $\beta$ -barrel surface of the next molecule.

## SUPPLEMENTAL FIGURES

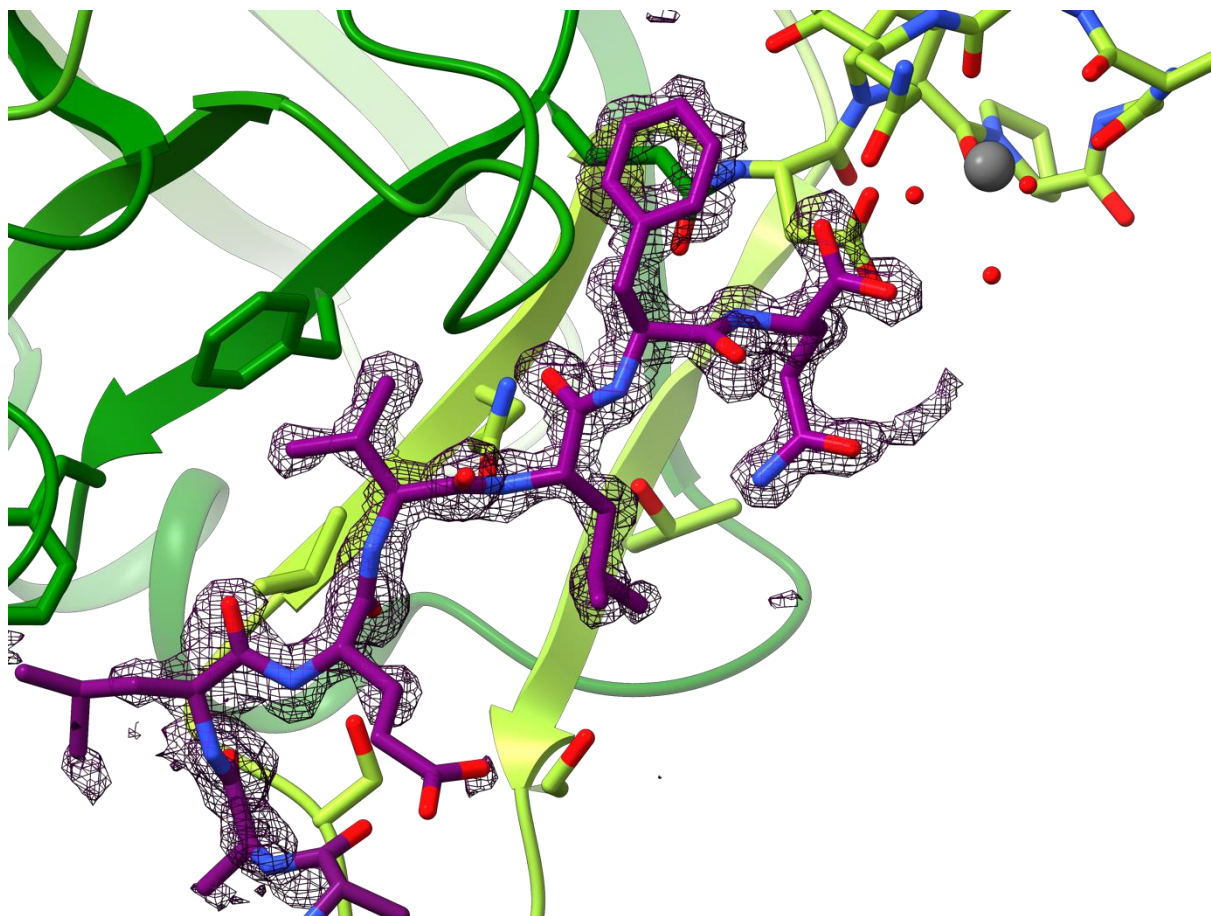

**Supplementary Fig. 11:** Crystal contacts between the C-terminus of one *anaCyp40* molecule with C-domain of a second molecule. The C-terminal amino acids “LEVLFQ” from the PreScission protease recognition site are shown in the Fo-Fc omit map at  $3\sigma$  contour level.

## SUPPLEMENTAL FIGURES

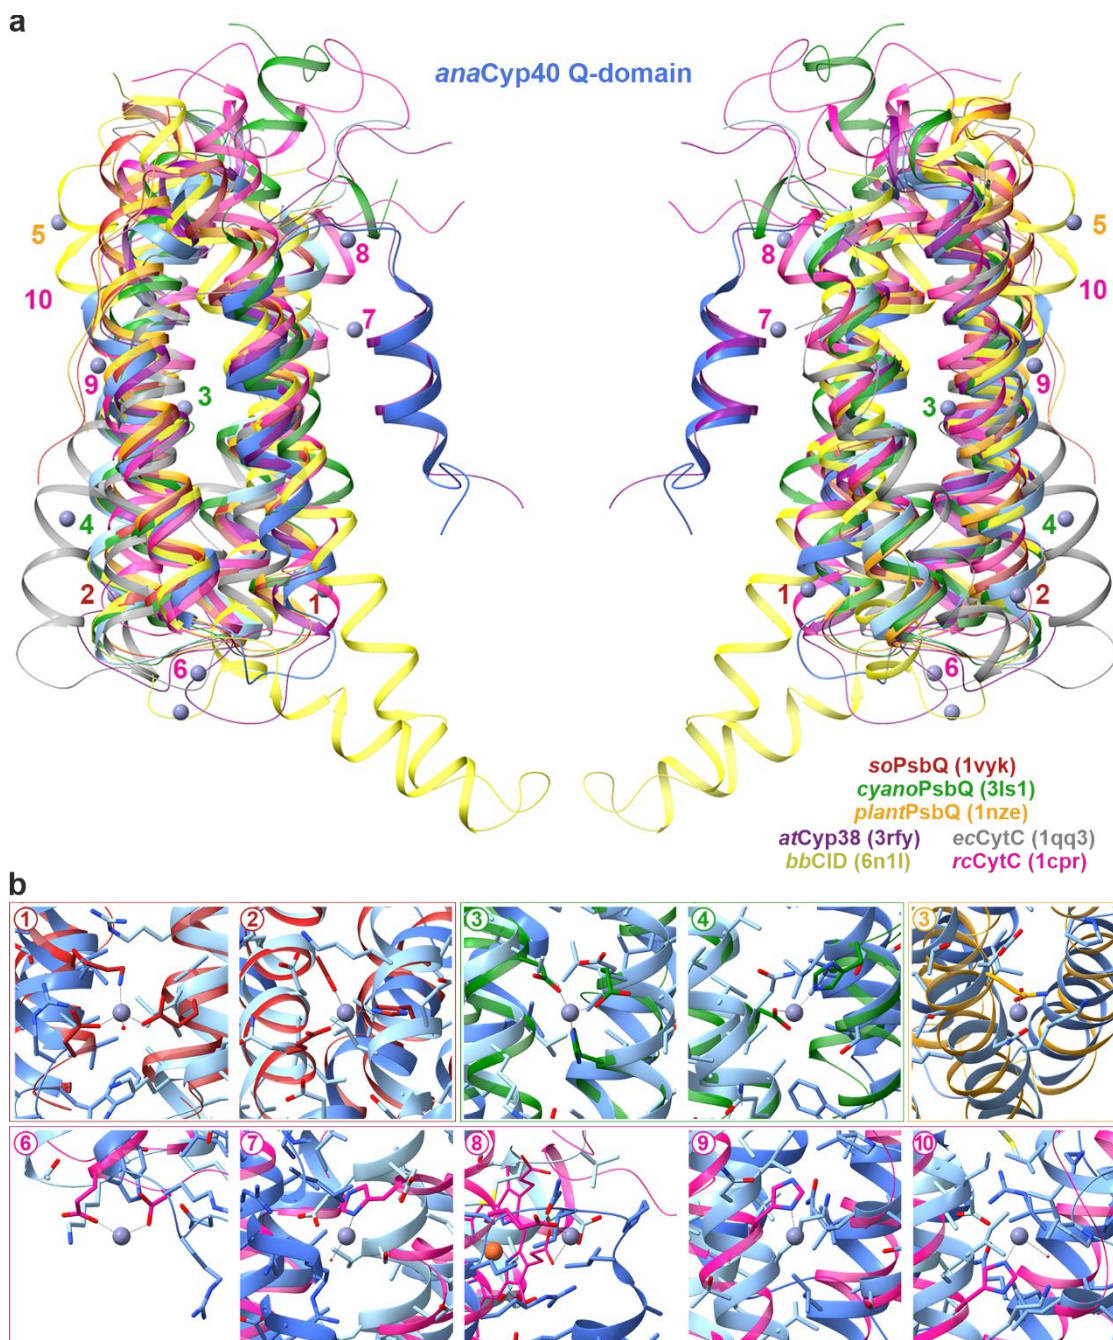

**Supplementary Fig. 12:** Comparison of *anaCyp40* Q-domain to structurally related proteins. **a** The N-terminal Q-domain of *anaCyp40* is superimposed to diverse helix bundles of structurally related proteins identified by DALI<sup>7</sup> and which have an RMSD < 2 Å. In addition to the cyanobacterial and plant PsbQs (1vyk<sup>8</sup>: red; 3ls1<sup>9</sup>: green; 1nze<sup>10</sup>: orange), also bacterial cytochrome C (1qq3<sup>11</sup>: grey, 1cpr<sup>12</sup>: magenta), the complement inhibitory domain of BBK32 (6n1l<sup>13</sup>: yellow), and the Q-domain of *atCyp38* (3rfy<sup>14</sup>: purple) are superimposed to *anaCyp40* Q-domain. Although most of these proteins have Zn<sup>2+</sup> bound on their surface, neither the positions of the Zn<sup>2+</sup> ion nor the coordinating residues are conserved. **b** Individual comparison of the sites where Zn<sup>2+</sup> ions were bound and the corresponding site in *anaCyp40*. The location of the Zn<sup>2+</sup> ions on the helix bundle is indicated by the numbers.

## SUPPLEMENTAL FIGURES

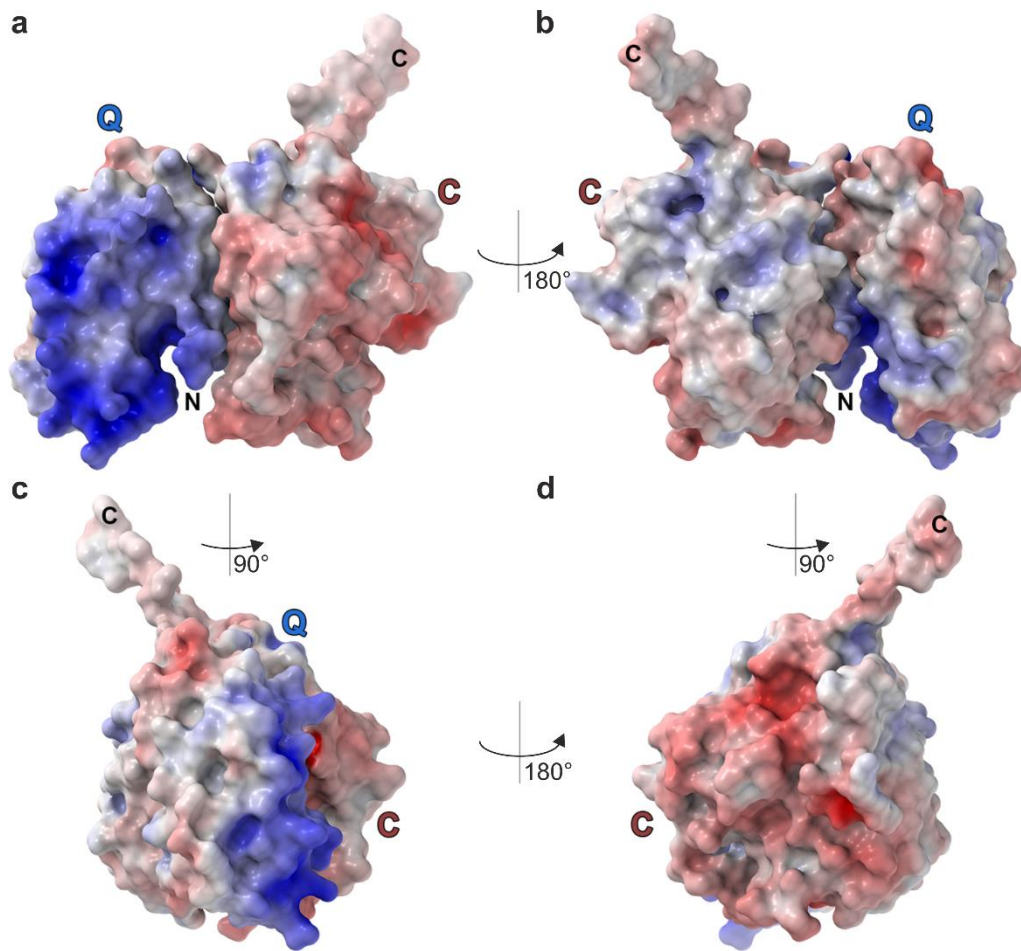

**Supplementary Fig. 13:** The electrostatic surface potential distribution of *anaCyp40*.

Electrostatic surface potential distribution of *anaCyp40* seen from different perspectives. **a** and **b** show the representation presented in Fig. 6a, while **c** and **d** are counter-clockwise and clockwise 90° vertical rotations of **a**, respectively. The position of the N- and C-terminus (small letters), as well as of the Q- and C-domain (large letters) are indicated. The Q-domain is mainly positively charged (shown in blue) while the C domain is slightly negatively charged (shown in red).

## SUPPLEMENTARY TABLES

**Supplementary Table 1: List of genes used for phylogenetic analysis.** Given is the organism name, the protein ID and the gene accession number. The sequences are provided as [Supplementary data 1](#).

|     | Organism                                                              | Protein ID           | Gene              |
|-----|-----------------------------------------------------------------------|----------------------|-------------------|
| 1.  | <i>Nostoc sp.</i> (strain PCC 7120 / SAG 25.82 / UTEX 2576)           | Q8YM80               | alr5059           |
| 2.  | <i>Gloeobacter violaceus</i> (strain PCC 7421)                        | Q7NG65               | gll3308           |
| 3.  | <i>Anabaena cylindrica</i> (strain ATCC 27899 / PCC 7122)             | K9Z9J9               | Anacy_0270        |
| 4.  | <i>Nostoc punctiforme</i> (strain ATCC 29133 / PCC 73102)             | B2J712               | Npun_F0441        |
| 5.  | <i>Nostoc sp.</i> (strain ATCC 29411 / PCC 7524)                      | K9QZX2               | Nos7524_5280      |
| 6.  | <i>Anabaena variabilis</i> (strain ATCC 29413 / PCC 7937)             | Q3MAQ2               | Ava_2316          |
| 7.  | <i>Nostoc azollae</i> (strain 0708)                                   | D7E1K7               | Aazo_0811         |
| 8.  | <i>Cyanobacterium stanieri</i> (strain ATCC 29140 / PCC 7202)         | K9YIG0               | Cyast_0282        |
| 9.  | <i>Microcystis aeruginosa</i> (strain NIES-843)                       | B0JTU3               | MAE_13090         |
| 10. | <i>Cyanothece sp.</i> (strain ATCC 51142)                             | B1WP74               | cce_0505          |
| 11. | <i>Arthrospira platensis</i> (strain NIES-39 / IAM M-135)             | D4ZPR7               | NIES39_D07450     |
| 12. | <i>Trichodesmium erythraeum</i> (strain IMS101)                       | Q116D7               | Tery_1312         |
| 13. | <i>Lyngbya sp.</i> (strain PCC 8106)                                  | A0YPV7               | L8106_21422       |
| 14. | <i>Stanieria cyanosphaera</i> (strain ATCC 29371 / PCC 7437)          | K9Y016               | Sta7437_4152      |
| 15. | <i>Acaryochloris marina</i> (strain MBIC 11017)                       | B0CD62               | AM1_0603          |
| 16. | <i>Chamaesiphon minutus</i> (strain ATCC 27169 / PCC 6605)            | K9UJP7               | Cha6605_3707      |
| 17. | <i>Synechocystis sp.</i> (strain PCC 6803 / Kazusa)                   | PPI3_SYNY3           | sll0408           |
| 18. | <i>Prochlorococcus marinus</i> (strain AS9601)                        | A2BNF1               | A9601_00241       |
| 19. | <i>Cyanobium gracile</i> (strain ATCC 27147 / PCC 6307)               | K9P908               | Cyagr_2330        |
| 20. | <i>Synechococcus sp.</i> (strain ATCC 27144 / PCC 6301 / SAUG 1402/1) | A0A0H3K3E3           | ppiB              |
| 21. | <i>Thermosynechococcus elongatus</i> (strain BP-1)                    | Q8DKN8               | tlr0821           |
| 22. | <i>Vitrella brassicaformis</i> (strain CCMP3155)                      | A0A0G4EJ74           | Vbra_20474        |
| 23. | <i>Emiliana huxleyi</i>                                               | R1F9L9               | EMIHURAFT_440955  |
| 24. | <i>Cyanidioschyzon merolae</i>                                        | M1USH1               | CYME_CMK307C      |
| 25. | <i>Galdieria sulphuraria</i>                                          | M2XYR0               | Gasu_36910        |
| 26. | <i>Chondrus crispus</i>                                               | R7QPR7               | CHC_T00000384001  |
| 27. | <i>Phaeodactylum tricornutum</i> (strain CCAP 1055/1)                 | B7FU48               | PHATRDRAFT_11022  |
| 28. | <i>Ectocarpus siliculosus</i>                                         | D8LET7               | CYN               |
| 29. | <i>Chlamydomonas reinhardtii</i>                                      | A8IRU6               | CYN38             |
| 30. | <i>Volvox carteri</i>                                                 | D8UIB6               | VOLCADRAFT_108119 |
| 31. | <i>Chlorella variabilis</i>                                           | E1Z2A2               | CHLNCRAFT_33486   |
| 32. | <i>Ostreococcus lucimarinus</i> (strain CCE9901)                      | A4RWY9               | OSTLU_38395       |
| 33. | <i>Micromonas commoda</i> (strain RCC299 / NOUM17 / CCMP2709)         | C1FEJ6               | TLP40             |
| 34. | <i>Klebsormidium flaccidum</i>                                        | KFL_000140480        | KFL_000140480     |
| 35. | <i>Marchantia polymorpha</i>                                          | Mapoly0001s0360      |                   |
| 36. | <i>Oryza sativa subsp. indica</i>                                     | B8BAB3               | Osi_29072         |
| 37. | <i>Brachypodium distachyon</i>                                        | I116Q4               | 100824311         |
| 38. | <i>Hordeum vulgare subsp. vulgare</i>                                 | A0A287WPI4           | n/a               |
| 39. | <i>Aegilops tauschii</i>                                              | M8CD05               | F775_28503        |
| 40. | <i>Triticum aestivum</i>                                              | A0A1D6CYY9           | -                 |
| 41. | <i>Eragrostis tef</i>                                                 | maker-scaffold7841-a | -                 |
| 42. | <i>Sorghum bicolor</i>                                                | A0A1Z5RAB0           | SORBI_3007G116950 |
| 43. | <i>Zea mays</i>                                                       | B6U5I1               | 100285487         |
| 44. | <i>Setaria italica</i>                                                | K3YHT3               | 101781132         |
| 45. | <i>Musa acuminata</i>                                                 | GSMUA_Achr1G13990_00 | -                 |
| 46. | <i>Nicotiana attenuata</i>                                            | A0A1J6IL97           | TLP40             |
| 47. | <i>Solanum lycopersicum</i>                                           | K4BBJ8               | XP_004232290.1    |
| 48. | <i>Cucumis sativus</i>                                                | A0A0A0LHY2           | Csa_3G836450      |
| 49. | <i>Lotus japonicus</i>                                                | Lj2g3v1014320        | -                 |
| 50. | <i>Manihot esculenta</i>                                              | A0A2C9UIA1           | MANES_15G183100   |
| 51. | <i>Populus trichocarpa</i>                                            | U5GVV7               | -                 |
| 52. | <i>Prunus persica</i>                                                 | M5WTM9               | PRUPE_3G283500    |
| 53. | <i>Arabidopsis thaliana</i>                                           | CYP40_ARATH          | CYP40             |
| 54. | <i>Theobroma cacao</i>                                                | A0A061ED69           | TCM_016868        |
| 55. | <i>Corchorus capsularis</i>                                           | A0A1R3IDS8           | CCACVL1_12798     |
| 56. | <i>Vitis vinifera</i>                                                 | D7TWR2               | VIT_14s0066g01410 |

|     |                                                  |            |                      |
|-----|--------------------------------------------------|------------|----------------------|
| 57. | <i>Amborella trichopoda</i>                      | W1PHN6     | AMTR_s00058p00167600 |
| 58. | <i>Physcomitrella patens subsp. patens</i>       | A9T157     | PHYPA_030052         |
| 59. | <i>Chenopodium quinoa</i>                        | -          | XP_021727682         |
| 60. | <i>Glycine max</i>                               | I1N5T2     | GLYMA_19G009700      |
| 61. | <i>Brassica napus</i>                            | A0A078IGH2 | BnaC05g48850D        |
| 62. | <i>Gossypium hirsutum</i>                        | A0A1U8HQH8 | LOC107888646         |
| 63. | <i>Selaginella moellendorffii</i>                | D8R8R1     | SELMODRAFT_408578    |
| 64. | <i>Deinococcus radiodurans</i> R1                | Q9RRF0     | DR_2542              |
| 65. | <i>Streptococcus pneumoniae</i> R6               | Q8DQG5     | ppiA                 |
| 66. | <i>Homo sapiens</i>                              | Q9Y3C6     | PPIL1                |
| 67. | <i>Mus musculus</i>                              | Q9D0W5     | Ppil1                |
| 68. | <i>Escherichia coli str. K-12 substr. MG1655</i> | P0AFL3     | ppiA                 |
| 69. | <i>Caenorhabditis elegans</i>                    | Q9U1Q3     | cyn-15               |
| 70. | <i>Schizosaccharomyces pombe</i>                 | Q09928     | cyp8                 |
| 71. | <i>Saccharomyces cerevisiae</i> S288C            | P23285     | CPR2                 |
| 72. | <i>Drosophila melanogaster</i>                   | Q9W0Q2     | Cypl                 |



## SUPPLEMENTARY TABLES

**Supplementary Table 2: Overview on transmembrane domain prediction.** Transmembrane domain and signal sequence prediction was performed with TMHMM<sup>15</sup>, TMpred<sup>16</sup>, HMMTOP<sup>17</sup>, Phobius<sup>18</sup>, SPLIT<sup>19</sup> and PRED-TMR<sup>20</sup>.

| <b>program</b>  | <b>Start AA</b> | <b>End AA</b> | <b>Score</b> |
|-----------------|-----------------|---------------|--------------|
| TMHMM           | 13              | 30            | 0.91         |
| TMpred          | 12              | 30            | 2170         |
| HMMTOP          | 13              | 30            | 17.0082      |
| Phobius         | 13              | 24            | 0.87285      |
| SPLIT           | 10              | 26            | 7.87         |
| PRED-TMR        | 13              | 31            | Not defined  |
| <b>CONSENSE</b> | <b>13</b>       | <b>30</b>     |              |

## SUPPLEMENTARY TABLES

| <b>Supplementary Table 3: Kinetic parameters of cyclophilins from different species</b> |                           |                                         |
|-----------------------------------------------------------------------------------------|---------------------------|-----------------------------------------|
| <b>Species</b>                                                                          | <b>Enzymatic activity</b> | <b>References</b>                       |
| <i>Anabaena</i> PCC7120 ( <i>anaCyp40</i> )                                             | 0.07 s <sup>-1</sup>      | (This study)                            |
| <i>Piriformospora indica</i> (PiCyPA)                                                   | 0.10 s <sup>-1</sup>      | (Trivedi et al. 2013) <sup>21</sup>     |
| <i>Arabidopsis thaliana</i> (AtCyp19-3)                                                 | 0.036 s <sup>-1</sup>     | (Kaur et al. 2015) <sup>22</sup>        |
| <i>Oryza sativa</i> (TaCypA-1)                                                          | 0.039 s <sup>-1</sup>     | (Sekhon et al. 2013) <sup>23</sup>      |
| <i>Zea mays</i> (PPI)                                                                   | 0.08 s <sup>-1</sup>      | (Sheldon and Venis, 1996) <sup>24</sup> |
| <i>Spinacia oleracea</i> (TLP40)                                                        | 0.04 s <sup>-1</sup>      | (Fulgosi et al. 1998) <sup>25</sup>     |

## SUPPLEMENTARY TABLES

| <b><i>Anabaena</i> strain</b> | <b>Resistance</b>               | <b>Relevant properties</b>  | <b>Source</b> |
|-------------------------------|---------------------------------|-----------------------------|---------------|
| PCC 7120                      |                                 | Wild type                   | C. P. Wolk    |
| AFS- <i>anacyp40</i> -strep   | Sp <sup>r</sup> Sm <sup>r</sup> | C-terminal Strep tag fusion | This study    |
| AFS-I- <i>anacyp40</i>        | Sp <sup>r</sup> Sm <sup>r</sup> | Gene interruption           | This study    |

<sup>a</sup>AFS, *Anabaena* Frankfurt Schleiff; Sp, spectinomycin; Sm, streptomycin.

## SUPPLEMENTARY TABLES

**Supplementary Table 5: Proteins of the PBS.** Given are the subcomplex annotation, the gene ID and the annotated name, the number of amino acids, the percentage of prolines in the sequence and the RPKM value extracted from Flaherty et al.<sup>26</sup>.

| Complex category | Gene ID        | Name         | aa          | % proline  | RPKM       |
|------------------|----------------|--------------|-------------|------------|------------|
| APC              | <b>Alr0020</b> | <b>ApcE</b>  | <b>1132</b> | <b>6.0</b> | <b>96</b>  |
|                  | <b>Alr0021</b> | <b>ApcA1</b> | <b>161</b>  | <b>3.1</b> | <b>275</b> |
|                  | <b>Alr0022</b> | <b>ApcB</b>  | <b>162</b>  | <b>1.9</b> | <b>313</b> |
|                  | <b>Asr0023</b> | <b>ApcC</b>  | <b>68</b>   | <b>2.9</b> | <b>153</b> |
|                  | All0450        | ApcA2        | 161         | 3.1        | 7          |
|                  | All2327        | ApcF         | 169         | 3.0        | 26         |
|                  | All3653        | ApcD         | 161         | 4.3        | 67         |
| CPC              | Alr0528        | CpcB         | 173         | 2.3        | 337        |
|                  | Alr0529        | CpcA         | 163         | 3.7        | 879        |
|                  | <b>Alr0530</b> | <b>CpcC</b>  | <b>266</b>  | <b>3.5</b> | <b>956</b> |
|                  | <b>Asr0531</b> | <b>CpcD</b>  | <b>80</b>   | <b>1.2</b> | <b>923</b> |
|                  | Alr0532        | CpcE         | 276         | 5.1        | 168        |
|                  | Alr0533        | CpcF         | 200         | 5.0        | 29         |
|                  | Alr0534        | CpcG1        | 279         | 5.0        | 25         |
|                  | <b>Alr0535</b> | <b>CpcG2</b> | <b>247</b>  | <b>6.1</b> | <b>43</b>  |
|                  | Alr0536        | CpcG3        | 237         | 4.2        | 58         |
|                  | <b>Alr0537</b> | <b>CpcG4</b> | <b>253</b>  | <b>3.2</b> | <b>42</b>  |
| PEC              | Alr0523        | PecB         | 172         | 1.2        | 1230       |
|                  | Alr0524        | PecA         | 162         | 3.7        | 152        |
|                  | <b>Alr0525</b> | <b>PecC</b>  | <b>278</b>  | <b>2.5</b> | <b>166</b> |
|                  | Alr0526        | PecE         | 253         | 4.3        | 30         |
|                  | Alr0527        | PecF         | 173         | 2.3        | 3          |

## SUPPLEMENTARY TABLES

**Supplementary Table 6: Photosynthetic parameter of wild-type and AFS-I-*anacyp40*.**

|                                                                          | WT               |                   | AFS-I- <i>anacyp40</i> |                   |
|--------------------------------------------------------------------------|------------------|-------------------|------------------------|-------------------|
|                                                                          | 40 $\mu\text{E}$ | 120 $\mu\text{E}$ | 40 $\mu\text{E}$       | 120 $\mu\text{E}$ |
| Pm ( $\mu\text{mol min}^{-1} \text{mg}_{\text{CHL}}^{-1}$ ) <sup>*</sup> | 4.5 $\pm$ 0.3    | 6.0 $\pm$ 0.3     | 5.1 $\pm$ 0.3          | 3.3 $\pm$ 0.2     |
| Ec ( $\mu\text{E m}^{-2} \text{s}^{-1}$ ) <sup>**</sup>                  | 110 $\pm$ 10     | 150 $\pm$ 20      | 130 $\pm$ 20           | 190 $\pm$ 30      |
| F <sub>PSI</sub> / F <sub>PSII</sub> (590 nm)                            | 0.17             | 0.17              | 0.16                   | 0.18              |
| F <sub>PSI</sub> / F <sub>PSII</sub> (440 nm)                            | 2.3              | 0.9               | 2.0                    | 0.9               |

<sup>\*</sup> Value for 1000  $\mu\text{E m}^{-2} \text{s}^{-1}$ ; <sup>\*\*</sup> estimated according to  $\text{Ec} = - [100 \mu\text{E m}^{-2} \text{s}^{-1}] / \ln (1 - [\text{OER}] / \text{Pm})$ ;  $[\text{O}] = \text{Pm} * (1 - \exp(-[\text{L}]/\text{Ec})) - \text{Ek}$ ; Pm ... maximal rate of net oxygen production at light saturation; Ec ... compensation irradiance, at which oxygen production was balanced by oxygen consumption; Ek ... the irradiance at the onset of photosynthesis saturation

## SUPPLEMENTARY TABLES

**Supplementary Table 7: Data collection and refinement statistics**

| <i>anaCyp40<sub>ΔTM</sub></i>                      |                                                   |
|----------------------------------------------------|---------------------------------------------------|
| <i>Data collection</i>                             |                                                   |
| Space group                                        | <i>P</i> 2 <sub>1</sub> (4)                       |
| Cell dimensions                                    | a = 41.2 Å, b = 103.2 Å, c = 44.2 Å<br>β = 114.7° |
| Matthews coeff. (Å <sup>3</sup> Da <sup>-1</sup> ) | 2.3                                               |
| Solvent content (%)                                | 46.5                                              |
| No. Molecules per AU                               | 1                                                 |
| Resolution (Å)                                     | 52 – 1.14 (1.14 – 1.18)                           |
| Wavelength (Å)                                     | λ = 1.0                                           |
| X-ray source                                       | ESRF ID29                                         |
| No. observed reflections                           | 1706153 (64337)                                   |
| No. unique reflections                             | 115733 (5453)                                     |
| Completeness (%)                                   | 95 (91.3)                                         |
| R <sub>meas</sub> (%)                              | 0.22 (0.754)                                      |
| R <sub>pim</sub> (%)                               | 0.058 (0.788)                                     |
| <i>I</i> / <i>σ</i>                                | 7.5 (1.6)                                         |
| <i>Refinement</i>                                  |                                                   |
| Resolution (Å)                                     | 50 - 1.14                                         |
| No. unique reflections                             | 115662                                            |
| No. Reflections in test set                        | 5617                                              |
| R <sub>work</sub> /R <sub>free</sub> (%)           | 17.68/19.47                                       |
| Wilson B-Factor (Å <sup>2</sup> )                  | 48.81                                             |
| No. atoms in AU                                    | 3445                                              |
| Protein                                            | 2664                                              |
| Ligands                                            | 31                                                |
| Water                                              | 579                                               |
| r.m.s. deviations:                                 |                                                   |
| Bond lengths (Å)                                   | 0.014                                             |
| Bond angels (°)                                    | 1.371                                             |

## SUPPLEMENTARY TABLES

**Supplementary Table 8: Oligonucleotides used in this study.**

| <b>Primer Name</b>                                           | <b>Sequence</b>                                  |
|--------------------------------------------------------------|--------------------------------------------------|
| <b><i>Anabaena</i> sp. mutant generation</b>                 |                                                  |
| AFS-I- <i>anacyp40</i> -F1                                   | GGATCCAATAAATAATAAGCCAGTACG                      |
| AFS-I- <i>anacyp40</i> -R1                                   | GGATCCGTAAATTCTAACCCATTATAG                      |
| AFS- <i>anacyp40-strep</i> -F1                               | ATCGATGCTGCATTGAGCTATTCC                         |
| AFS- <i>anacyp40-strep</i> -R1                               | TTACTTTTCGAACTGCGGGTGGCTCCAGGCTGATTGGGGTTGACTAAA |
| <b><i>Anabaena</i> sp. mutant confirmation by colony PCR</b> |                                                  |
| AFS-I- <i>anacyp40</i> -F2                                   | CGGTAGAGCTTTATTGCGGTA                            |
| AFS-I- <i>anacyp40</i> -R2                                   | GTTCTTTACCTGGTGGATCTCC                           |
| AFS- <i>anacyp40-Strep</i> -F2                               | GATTGATGGGTTACGCCTAGTC                           |
| AFS- <i>anacyp40-Strep</i> -R2                               | CTTTTCGAACTGCGGGTGGCTCCA                         |
| <b>Cloning for heterologous expression</b>                   |                                                  |
| <i>anacyp40</i> <sub>ΔTM(1-35)</sub> -F3                     | ATATATGCTCTTCTAGTGCCGCTTGCCATCTGGAAATGCGATT      |
| <i>anacyp40</i> <sub>ΔTM(1-35)</sub> -R3                     | TATATAGCTCTTCATGCGGCTGATTGGGGTTGACTAAATTGTC      |
| <b>q-RT PCR</b>                                              |                                                  |
| <i>anacyp40</i> -F4                                          | TTGCGGTATGCACTCCAAT                              |
| <i>anacyp40</i> -R4                                          | GCGGGATGCTTTACTCAGGT                             |
| <i>RT-as5059</i>                                             | GGACTCCTCCAGTAACGCC                              |
| <i>RT-5059</i>                                               | GCTGTAACCATCCACCACAAC                            |
| <i>5059-fw</i>                                               | CCTTGCCATCTGGAAATGCG                             |
| <i>5059-rv</i>                                               | GCTTGCAAGTTCGCGTACTGG                            |
| <i>rnpB-rv</i>                                               | GGGTTTACCGAGCCAGTACC                             |
| <i>rnpB-fw</i>                                               | AGGGAGAGAGTAGGCGTTGG                             |
| <i>16SrRNA</i> -R                                            | CACACTGGGACTGAGACAC                              |
| <i>16SrRNA</i> -R                                            | CTGCTGGCACGGAGTTAG                               |
| <b>Sequencing primers</b>                                    |                                                  |
| T7                                                           | TAATACGACTCACTATAGGG                             |
| SP6                                                          | ATTTAGGTGACACTATAG                               |

## SUPPLEMENTARY TABLES

**Supplementary Table 9: Plasmids used in this study.**

| Plasmid                                                                    | Marker <sup>a</sup>              | Properties                                                                                             | Source or reference                |
|----------------------------------------------------------------------------|----------------------------------|--------------------------------------------------------------------------------------------------------|------------------------------------|
| pGEM-T                                                                     | Ap <sup>r</sup>                  | TA cloning vector                                                                                      | Promega                            |
| pGEM-T-Easy                                                                | Ap <sup>r</sup>                  | TA cloning vector                                                                                      | Promega                            |
| pCSV3                                                                      | Sp <sup>r</sup> Sm <sup>r</sup>  | pRL500 with substituted Ap <sup>r</sup> gene                                                           | Olmedo-Verd et al. <sup>27</sup>   |
| pRL623                                                                     | Cm <sup>r</sup>                  | Mobilization helper and methylases for Aval-<br>AvalI and AvalII sites                                 | Elhai et al. <sup>28</sup>         |
| pRL443                                                                     | Ap <sup>r</sup>                  | Shuttle vector derived from RP4 suitable for<br>mobilizing plasmids to <i>Anabaena</i> sp. PCC<br>7120 | Elhai et al. <sup>28</sup>         |
| pINITIAL                                                                   | Cm <sup>r</sup>                  | Initial sequencing vector for FX cloning                                                               | Geertsma and Dutzler <sup>29</sup> |
| pF7XC3H                                                                    | Cm <sup>r</sup> Kan <sup>r</sup> | Expression vector for FX subcloning                                                                    | Geertsma and Dutzler <sup>29</sup> |
| pGEMT-I- <i>anacyp40</i>                                                   | Ap <sup>r</sup>                  | pGEMT with frag. (bp 168-665) of <i>alr5059</i>                                                        | This study                         |
| pGEMT-Easy- <i>anacyp40</i> -strep                                         | Ap <sup>r</sup>                  | pGEMT Easy with full length <i>alr5059</i> and a C-<br>terminal <i>Strep</i> -tag                      | This study                         |
| pCSV3-I- <i>anacyp40</i>                                                   | Sp <sup>r</sup> Sm <sup>r</sup>  | pCSV3 with frag. (bp 168-665) of <i>alr5059</i>                                                        | This study                         |
| pCSV3- <i>anacyp40</i> -strep                                              | Sp <sup>r</sup> Sm <sup>r</sup>  | pCSV3 with full length <i>alr5059</i> and a C-<br>terminal <i>Strep</i> -tag                           | This study                         |
| pINIT_cat- <i>anacyp40</i> <sub>ΔTM(1-35)</sub>                            | Cm <sup>r</sup>                  | pINIT_cat with <i>alr5059</i> frag. (aa 36-368)                                                        | This study                         |
| F7XC3H- <i>anacyp40</i> <sub>ΔTM(1-35)</sub> -HRV<br>3C- His <sub>10</sub> | Cm <sup>r</sup> Kan <sup>r</sup> | F7XC3H with <i>alr5059</i> frag. (aa 36-368)                                                           | This study                         |



## REFERENCES IN SUPPLEMENTARY INFORMATION ONLY

1. Stevanovic M, Lehmann C, Schleiff E. The response of the TonB-dependent transport network in *Anabaena* sp. PCC 7120 to cell density and metal availability. *Biomaterials*. 26, 549-560 (2013).
2. Ho, E.C., Donaldson, M.E. and Saville, B.J., 2010. Detection of antisense RNA transcripts by strand-specific RT-PCR. In *RT-PCR Protocols* (pp. 125-138). Humana Press, Totowa, NJ.
3. Brenes-Álvarez, M. et al. Elements of the heterocyst-specific transcriptome unravelled by co-expression analysis in *Nostoc* sp. PCC 7120. *Environ. Microbiol.* **21**, 2544-2558 (2019).
4. Haddad, F., Qin, A.X., Giger, J.M. et al. Potential pitfalls in the accuracy of analysis of natural sense-antisense RNA pairs by reverse transcription-PCR. *BMC Biotechnol* **7**, 21 (2007).
5. Descloux, A., Größmayer, K.S. & Radenovic, A. Parameter-free image resolution estimation based on decorrelation analysis. *Nat Methods* **16**, 918–924 (2019).
6. Paddock, S.W. Confocal laser scanning microscopy. *Biotechniques* **27**, 992–1004 (1999).
7. Holm, L. DALI and the persistence of protein shape. *Protein Sci.* **29**, 128-140 (2020).
8. Balsera, M., Arellano, J.B., Revuelta, J.L., de las Rivas, J., Hermoso, J.A. The 1.49 Å resolution crystal structure of PsbQ from photosystem II of *Spinacia oleracea* reveals a PPII structure in the N-terminal region. *J. Mol. Biol.* **350**, 1051-1060 (2005).
9. Jackson, S.A., Fagerlund, R.D., Wilbanks, S.M., Eaton-Rye, J.J. Crystal structure of PsbQ from *Synechocystis* sp. PCC 6803 at 1.8 Å: implications for binding and function in cyanobacterial photosystem II. *Biochem.* **49**, 2765-2767 (2010).
10. Calderone, V., Trabucco, M., Vujčić, A., et al. Crystal structure of the PsbQ protein of photosystem II from higher plants. *EMBO Rep.* **4**, 900-905 (2003).
11. Arnesano, F., Banci, L., Bertini, I., Ciofi-Baffoni, S., Woodyear, T.L., Johnson, C.M. & Barker, P.D. Structural consequences of b- to c-type heme conversion in oxidized *Escherichia coli* cytochrome b562. *Biochem.* **39**, 1499-1514 (2000).
12. Tahirov, T.H., Misaki, S., Meyer, T.E., Cusanovich, M.A., Higuchi, Y. & Yasuoka, N. Structure of cytochrome c' from *Rhodobacter capsulatus* strain St Louis: an unusual molecular association induced by bridging Zn ions. *Acta Crystallogr. D* **53**, 658-664 (1997).
13. Xie, J., Zhi, H., Garrigues, R.J., Keightley, A., Garcia, B.L. & Skare, J.T. Structural determination of the complement inhibitory domain of *Borrelia burgdorferi* BBK32 provides insight into classical pathway complement evasion by Lyme disease spirochetes. *PLoS Pathog.* **15**, e1007659 (2019).
14. Vasudevan, D., Fu, A., Luan, S. & Swaminathan, K. Crystal structure of *Arabidopsis* cyclophilin38 reveals a previously uncharacterized immunophilin fold and a possible autoinhibitory mechanism. *Plant Cell*, **24**, 2666-2674 (2012).
15. Krogh, A., Larsson, B., von Heijne, G. & Sonnhammer, E. L. Predicting transmembrane protein topology with a hidden Markov model: application to complete genomes. *J. Mol. Biol.* **305**, 567-580 (2001).
16. Hofmann, K. & Stoffel W. TMbase - A database of membrane spanning proteins segments. *Biol. Chem. Hoppe-Seyler* **374**, 166 (1993).
17. Tusnady, G. E. & Simon, I. The HMMTOP transmembrane topology prediction server. *Bioinformatics*, **17**, 849-850 (2001).
18. Kall, L., Krogh, A. & Sonnhammer, E.L. A combined transmembrane topology and signal peptide prediction method. *J. Mol. Biol.* **338**, 1027-1036 (2004).
19. Juretic, D., Zoranic, L. & Zucic, D. Basic charge clusters and predictions of membrane protein topology. *J. Chem. Inf. Comput. Sci.* **42**, 620-632 (2002).
20. Pasquier, C., Promponas, V.J., Palaios, G.A., Hamodrakas, J.S. & Hamodrakas, S.J. A novel method for predicting transmembrane segments in proteins based on a statistical analysis of the SwissProt database: the PRED-TMR algorithm. *Protein Eng.* **12**, 381-385 (1999).

21. Trivedi, D.K., Ansari, M.W., Dutta, T., Singh, P. and Tuteja, N., 2013. Molecular characterization of cyclophilin A-like protein from *Piriformospora indica* for its potential role to abiotic stress tolerance in *E. coli*. *BMC research notes*, **6**(1), pp.1-9.
22. Kaur, G., Singh, S., Singh, H., Chawla, M., Dutta, T., Kaur, H., Bender, K., Snedden, W.A., Kapoor, S., Pareek, A. and Singh, P., 2015. Characterization of peptidyl-prolyl cis-trans isomerase-and calmodulin-binding activity of a cytosolic *Arabidopsis thaliana* cyclophilin AtCyp19-3. *PLoS one*, **10**(8), p.e0136692.
23. Sekhon, S.S., Kaur, H., Dutta, T., Singh, K., Kumari, S., Kang, S., Park, S.G., Park, B.C., Jeong, D.G., Pareek, A. and Woo, E.J., 2013. Structural and biochemical characterization of the cytosolic wheat cyclophilin TaCypA-1. *Acta Crystallographica Section D: Biological Crystallography*, **69**(4), pp.555-563.
24. Sheldon, P.S. and Venis, M.A., 1996. Purification and characterization of cytosolic and microsomal cyclophilins from maize (*Zea mays*). *Biochemical Journal*, **315**(3), pp.965-970.
25. Fulgosi, H., Vener, A. V., Altschmied, L., Herrmann, R. G. & Andersson, B. A novel multi-functional chloroplast protein: identification of a 40 kDa immunophilin-like protein located in the thylakoid lumen. *EMBO J*, **17**, 1577-1587 (1998).
26. Flaherty, B.L., Van Nieuwerburgh, F., Head, S.R. & Golden, J.W. Directional RNA deep sequencing sheds new light on the transcriptional response of *Anabaena* sp. strain PCC 7120 to combined-nitrogen deprivation. *BMC Genomics*. **12**, 332 (2011).
27. Olmedo-Verd, E., Muro-Pastor, A.M., Flores, E. & Herrero, A. Localized induction of the *ntcA* regulatory gene in developing heterocysts of *Anabaena* sp. strain PCC 7120. *J. Bacteriol.* **188**, 6694-6699 (2006).
28. Elhai, J., Vepriksiy, A., Muro-Pastor, A.M., Flores, E. & Wolk, C.P. Reduction of conjugal transfer efficiency by three restriction activities of *Anabaena* sp. strain PCC 7120. *J. Bacteriol.* **179**, 1998-2005 (1997).
29. Geertsma, E.R. & Dutzler, R. A Versatile and Efficient High-Throughput Cloning Tool for Structural Biology." *Biochem.* **50**, 3272-3278 (2011).
